# Supplementary material for: Molecular Epidemiology Reveals Low Genetic Diversity among Cryptococcus neoformans Isolates from People Living with HIV in Lima, Peru, during the Pre-HAART Era
Source: PubMed Central journal article supplement (PMC7459599; doi:10.3390/pathogens9080665), 2020-08-18
Supplement: pathogens-09-00665-s001.pdf [file pathogens-09-00665-s001.pdf]

**Table S1.** GenBank accession numbers of all MLST sequences used in this study.

| <b>Loci</b>  | <b>Allele</b>         | <b>GenBank accession No</b> |
|--------------|-----------------------|-----------------------------|
| <i>CAP59</i> | <i>CAP59</i> allele 1 | KF792046                    |
|              | <i>CAP59</i> allele 2 | KF792047                    |
|              | <i>CAP59</i> allele 7 | KF792048                    |
| <i>GPD1</i>  | <i>GPD1</i> allele 1  | KF792042                    |
|              | <i>GPD1</i> allele 3  | KF792043                    |
|              | <i>GPD1</i> allele 9  | KF792044                    |
|              | <i>GPD1</i> allele 10 | KF792045                    |
| <i>IGS1</i>  | <i>IGS1</i> allele 1  | KF792049                    |
|              | <i>IGS1</i> allele 10 | KF792050                    |
|              | <i>IGS1</i> allele 14 | KF792051                    |
|              | <i>IGS1</i> allele 38 | KF792052                    |
|              | <i>IGS1</i> allele 39 | KF792053                    |
| <i>LAC1</i>  | <i>LAC1</i> allele 1  | KF792036                    |
|              | <i>LAC1</i> allele 2  | KF792037                    |
|              | <i>LAC1</i> allele 3  | KF792038                    |
|              | <i>LAC1</i> allele 5  | KF792039                    |
|              | <i>LAC1</i> allele 8  | KF792040                    |
|              | <i>LAC1</i> allele 11 | KF792041                    |
| <i>PLB1</i>  | <i>PLB1</i> allele 1  | KF792031                    |
|              | <i>PLB1</i> allele 2  | KF792032                    |
|              | <i>PLB1</i> allele 4  | KF792033                    |
|              | <i>PLB1</i> allele 11 | KF792034                    |
|              | <i>PLB1</i> allele 12 | KF792035                    |
| <i>SOD1</i>  | <i>SOD1</i> allele 1  | KF792029                    |
|              | <i>SOD1</i> allele 16 | KF792030                    |
| <i>URA5</i>  | <i>URA5</i> allele 1  | KF792024                    |
|              | <i>URA5</i> allele 2  | KF792025                    |
|              | <i>URA5</i> allele 4  | KF792026                    |
|              | <i>URA5</i> allele 15 | KF792027                    |
|              | <i>URA5</i> allele 33 | KF792028                    |
